# Supplementary material for: Effect of interleukin-6 polymorphism on risk of preterm birth within population strata: a meta-analysis
Source: PubMed Central journal article supplement (PMC3639799; doi:10.1186/1471-2156-14-30), 2013-04-25
Supplement: 1471-2156-14-30-S1.pdf [file 1471-2156-14-30-S1.pdf]

**Additional file 1. All the included and excluded papers and the reasons of inclusion or exclusion**

| Author                     | Year | Journal                   | Human | Inclusion Criteria |                  |         |            | Notes                                                                                                                                  |
|----------------------------|------|---------------------------|-------|--------------------|------------------|---------|------------|----------------------------------------------------------------------------------------------------------------------------------------|
|                            |      |                           |       | PTB phenotype      | rs1800795 tested | English | HWE tested |                                                                                                                                        |
| <b>(a) Included papers</b> |      |                           |       |                    |                  |         |            |                                                                                                                                        |
| Pereyra et al              | 2012 | BMC Research Note         | Yes   | Yes                | Yes              | Yes     | Yes        |                                                                                                                                        |
| Harper M et al             | 2011 | Obstet Gynecol            | Yes   | Yes                | Yes              | Yes     | Yes        | Contacted the author for the detail genotype count and population stratification.<br>Got the numbers but no population stratification. |
| Gomez LM et al             | 2010 | Am J Obstet Gynecol       | Yes   | Yes                | Yes              | Yes     | Yes        | Contacted the author for population stratification, but no data available.                                                             |
| Moura E et al              | 2009 | J Reprod Immunol          | Yes   | Yes                | Yes              | Yes     | Yes        | Contacted the author for population stratification, but no data available.                                                             |
| Hollegaard MV et al        | 2008 | Acta Obstet Gynecol Scand | Yes   | Yes                | Yes              | Yes     | Yes        | Contacted the author for the genotype count and got the data.                                                                          |
| Stonek F et al             | 2008 | Am J Reprod Immunol.      | Yes   | Yes                | Yes              | Yes     | Yes        |                                                                                                                                        |
| Velez DR et al             | 2007 | Ann Hum Genet             | Yes   | Yes                | Yes              | Yes     | Yes        | Contacted the author for the genotype count and got the data.<br>Included the subgroups that are in HWE.                               |
| Speer EM et al             | 2006 | Hum Immunol.              | Yes   | Yes                | Yes              | Yes     | Yes        | Contacted the author for population stratification, but no data available.                                                             |
| Menon R et al.             | 2006 | Am J Obstet Gynecol       | Yes   | Yes                | Yes              | Yes     | Yes        |                                                                                                                                        |
| Annels MF et al.           | 2004 | Am J Obstet Gynecol.      | Yes   | Yes                | Yes              | Yes     | Yes        |                                                                                                                                        |
| Härtel Ch et al.           | 2004 | Mol Hum Reprod.           | Yes   | Yes                | Yes              | Yes     | Yes        |                                                                                                                                        |
| Simhan HN et al.           | 2003 | Am J Obstet Gynecol       | Yes   | Yes                | Yes              | Yes     | Yes        |                                                                                                                                        |
| <b>(b) Excluded papers</b> |      |                           |       |                    |                  |         |            |                                                                                                                                        |
| Resch B et al              | 2010 | Ann Neurol.               | Yes   | No                 |                  |         |            | Phenotype studied is chorioamnionitis and cerebral palsy.                                                                              |
| Bitner A et a              | 2010 | Arch Med Sci              | Yes   | No                 |                  |         |            | An exclusively PPROM study.                                                                                                            |
| Romero R et al             | 2010 | Am J Obstet Gynecol       | Yes   | Yes                | No               |         |            | Did not test rs1800795.                                                                                                                |
| Simhan HN                  | 2010 | Am J Obstet Gynecol       | Yes   | No                 | No               |         |            | An editorial comments for Romero's paper.                                                                                              |
| Resch B et al              | 2010 | J Perinatol               | Yes   | No                 |                  |         |            | Phenotype studied is chorioamnionitis and cystic periventricular leucomalacia.                                                         |
| Kalinka J et al            | 2009 | Ginekol Pol               | Yes   | Yes                | Yes              | No      |            | An article in Polish.                                                                                                                  |
| Sata F et al               | 2009 | Mol Hum Reprod            | Yes   | Yes                | No               |         |            | Did not test rs1800795.                                                                                                                |
| Reiman M et al             | 2009 | Pediatr Res.              | Yes   | No                 |                  |         |            | Phenotype studied is the volume of gray matter in preterm infant.                                                                      |
| Reiman M et al             | 2008 | J Pediatr                 | Yes   | No                 |                  |         |            | Phenotype studied is chorioamnionitis and neonatal infections in preterm infants.                                                      |
| Fortunato SJ et al         | 2008 | Am J Obstet Gynecol       | Yes   | Yes                | No               |         |            | Did not test rs1800795.                                                                                                                |

|                     |      |                         |     |     |     |     |     |                                                                                                             |
|---------------------|------|-------------------------|-----|-----|-----|-----|-----|-------------------------------------------------------------------------------------------------------------|
| Velez DR et al      | 2008 | Hum Mol Genet.          | Yes | Yes | Yes | Yes | Yes | Missing data. Contacted the author for the genotype count, but no data available.                           |
| Göpel W et al.      | 2006 | Genes Immun             | Yes | No  |     |     |     | Phenotype studied is sepsis susceptibility and intraventricular hemorrhage in preterm infants.              |
| Treszl A et al.     | 2006 | Front Biosci            | Yes | No  |     |     |     | Phenotype studied is necrotizing enterocolitis.                                                             |
| Mattar et al.       | 2006 | J Reprod Med            | Yes | Yes | Yes | Yes | No  | Missing data for HWE evaluation. Contacted the author for the genotype count, but no data available.        |
| Engel et al.        | 2005 | Epidemiology            | Yes | Yes | Yes | Yes | Yes | Missing data. Contacted the author for the genotype count, but no data available.                           |
| Jamie WE et al.     | 2005 | Am J Obstet Gynecol.    | Yes | No  |     |     |     | Symptomatic study group: Exclusively to woman who experienced uterine contractions between 23 and 32 weeks. |
| Bokodi G et al.     | 2005 | Eur Cytokine Netw       | Yes | No  |     |     |     | Phenotype studied is ventilation characteristics in preterm baby.                                           |
| Vásárhelyi B et al. | 2005 | Pediatr Nephrol.        | Yes | No  |     |     |     | Phenotype studied is acute renal failure in preterm baby.                                                   |
| Harding DR et al.   | 2004 | Pediatrics              | Yes | No  |     |     |     | Phenotype studied is neurological and development severity for preterm infant.                              |
| Treszl A et al.     | 2003 | J Pediatr Surg          | Yes | No  |     |     |     | Phenotype studied is necrotizing enterocolitis in preterm infant.                                           |
| Yoshimura K et al.  | 2003 | J Soc Gynecol Investig. | No  |     |     |     |     | Murine infection model experiment.                                                                          |

- Inclusion criteria were applied from left to right. The article is excluded when the first “No” occurred.
