# Supplementary material for: Effect of interleukin-6 polymorphism on risk of preterm birth within population strata: a meta-analysis
Source: PubMed Central journal article supplement (PMC3639799; doi:10.1186/1471-2156-14-30), 2013-04-25
Supplement: 1471-2156-14-30-S3.pdf [file 1471-2156-14-30-S3.pdf]

**Additional file 3: Meta-regression analysis for (a) maternal genotype studies, (b) fetal genotype studies**

**(a) Meta-regression analysis for maternal genotype studies**

| Author                           | OR   | CC frequency | Sample size |
|----------------------------------|------|--------------|-------------|
| <b>Women of European descent</b> |      |              |             |
| Annels et al                     | 0.70 | 0.18         | 387         |
| Hartel et al                     | 0.79 | 0.11         | 646         |
| Hollegaard MV et al              | 1.05 | 0.22         | 117         |
| Menon et al                      | 0.83 | 0.11         | 427         |
| Simhan et al                     | 0.14 | 0.21         | 149         |
| Stonek F et al                   | 0.27 | 0.15         | 1388        |
| <b>Heterogeneous population</b>  |      |              |             |
| Gomez LM et al                   | 1.06 | 0.02         | 696         |
| Harper et al                     | 0.72 | 0.08         | 582         |
| Moura E et al                    | 1.06 | 0.04         | 205         |
| Moura E et al                    | 0.83 | 0.06         | 181         |
| Simhan et al                     | n/a  | 0.00         | 58          |
| Speer EM et al                   | 1.22 | 0.16         | 159         |

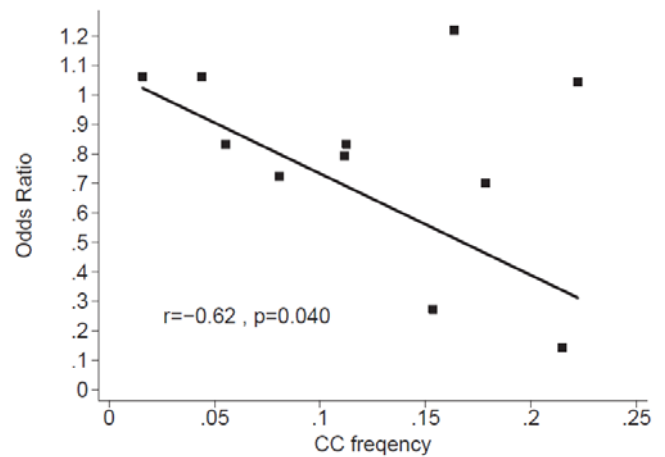

**(b) Meta-regression analysis for fetal genotype studies**

| Author                           | OR   | CC frequency | Sample size |
|----------------------------------|------|--------------|-------------|
| <b>Women of European descent</b> |      |              |             |
| Hartel et al                     | 0.92 | 0.15         | 1097        |
| <b>Heterogeneous population</b>  |      |              |             |
| Pereyra et al                    | n/a  | 0.00         | 109         |
| Speer EM et al                   | 1.53 | 0.14         | 156         |
| Velez et al                      | 1.07 | 0.02         | 305         |

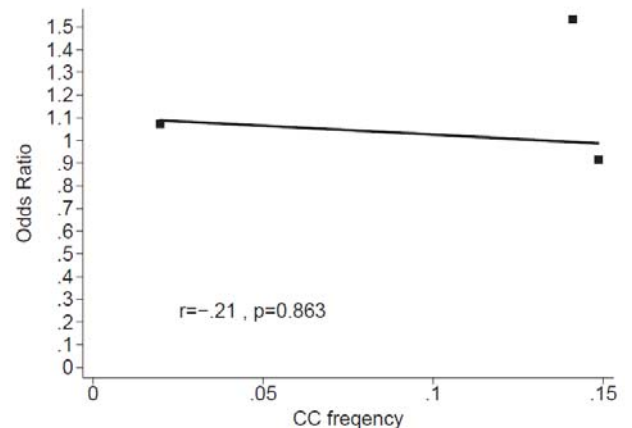

The odds ratio (OR), CC genotype frequency at rs1800795, and total sample size are shown for each study in the tables. Each study was represented as a square on the scatter plot with OR on Y axis, and CC frequency on X axis. Regression analysis was performed by: OR as a dependent variable, CC frequency as an independent variable, and each study was scaled by its sample size while the total number of the studies is kept constant. The regression fit line is shown. The result is significant for maternal studies, with a negative correlation ( $r$ ) of -0.62, and  $p$  value of 0.040. It is not significant for fetal studies.
